# Supplementary material
Source: PubMed Central journal article supplement (PMC2507730)

# **Synthesis of (+)-Bullatacin via the Highly Diastereoselective [3+2] Annulation Reaction of a Racemic Aldehyde and a Non-Racemic Allylsilane**

Jennifer M. Tinsley, Eric Mertz, Pek Y. Chong, Robert-André F. Rarig and William R. Roush\*†

Department of Chemistry, University of Michigan, Ann Arbor, MI 48109

Email: [roush@scripps.edu](mailto:roush@scripps.edu)

† **Current Address:** Scripps Florida, Medicinal Chemistry

5353 Parkside Drive, RF-2, Jupiter, FL 33458

e-mail: [roush@scripps.edu](mailto:roush@scripps.edu)

**Supporting Information – Part II**  
**Copies of <sup>1</sup>H NMR Spectra**

STANDARD PROTON PARAMETERS

```

expt1 s2pu1
SAMPLE
date Mar 16 2005 dfrq DEC. 4 VT 493.907
solvent CDCl3 dh H1
file /export/home/~dpwr 33
M2_085Clean.fid dp 0
ACQUISITION dnm mm0
sfrq 493.907 dmf 16123
dn H1 dsed 1.0
np 40000 homo 1.0
sw 8000.0
fd 4000 wfttle
DSMWR 55 ploc not used
pw 1.000 math
d1 1.000 wft
tof 0 wft
ct 8 WEXP
cs 55 WEXP
atlock n wft
gain not used
flags not used
in n
dp y
hs mm
DISPLAY--921.0
sp 5879.1
vs 246
sc 0
WCmm 24.0
ns 23.420
ts 33.457
rfp1 5136.6
rfp 3829.3
ins
ms cdc ph 1.000
  
```

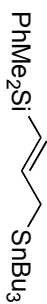

9

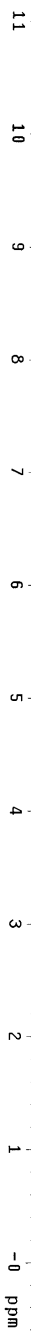

STANDARD 1H OBSERVE

exp1 std1h

SAMPLE DEC. & VT  
date Feb 5 2005 dfreq 300.075  
solvent CDCl3 dn H1  
/acq/300.075.dmr dpr 45  
Mercury-300/MPT2A- dm 45  
/EM2\_080CLEAN.fid dm mnn  
ACQUISITION dnm  
strq 300.075 dnm  
f1 45  
PROCRESSING 4751  
at 3.333 lb not used  
mp 30000 wfile  
sw 4500.5 proc ft  
td 2000 fn 32768  
td 45  
twrf 58 warr  
pw 3.9 wexp  
dl 0 wds  
dof 0 wts  
ct 64 wrt  
ct 64  
atock not used  
gain not used  
fl1 n  
fln n  
in n  
dp y  
DISPLAY -108.6  
sp 3295.6  
vs 118  
sc 250  
WCmm 13.250  
ts 500.000  
rf1 781.9  
rf2 0  
rf3 0  
ins 100.000  
nm cdc ph

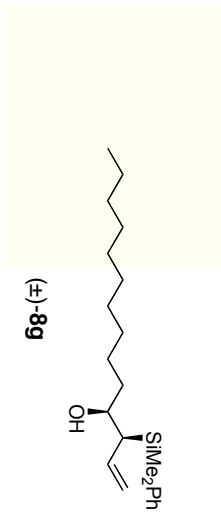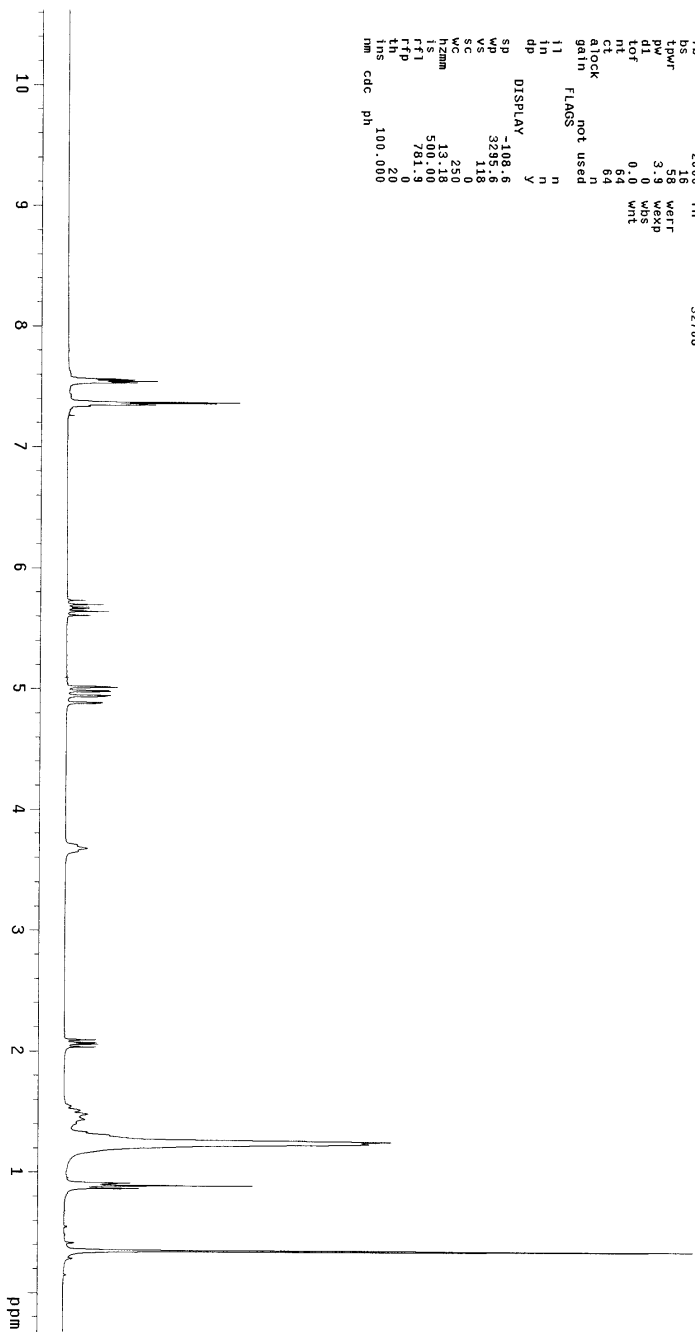

EM2-079

STANDARD PROTON PARAMETERS

```
expt s2pu1
SAMPLE
date Feb 23 2005 dfrq DEC. 6 VT 499.907
solvent CDCl3 dn H1
Insd /S0004/home2~ dfr 33
Insd /S0004/home2~ dfr 33
Insd N2.0790.fid dm mmn
ACQUISITION 499.907 dmh 16123
sfrq 499.907 dnt dnt 1.0
at 2.500 dfrq dfrq 1.0
np 40000 homo n
sw 8000.0 wffile PROCESSING
fd 4000 wffile wffile
td 8 fn fc not used
tpwr 55 fn fc not used
pw 2.7 math not used
di 1.000 wstr f
tcf 0 wstr f
ct 64 wsd f
atlock n wnt wnt
gain not used
j1 n
in n
dp y
hs Y
DISPLAY -234.1
sp 5598.9
vs 661
vc 25.0
h2mm 22.29
fs 1015.93
rf1 1507.3
rf2 7
rms 1.000
mm cdc ph
```

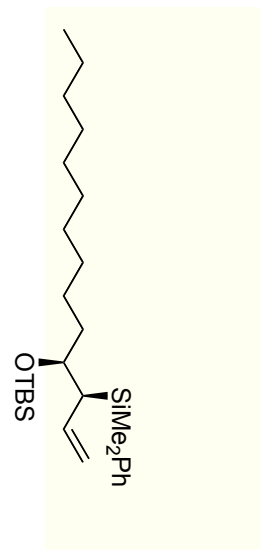

(±)-6

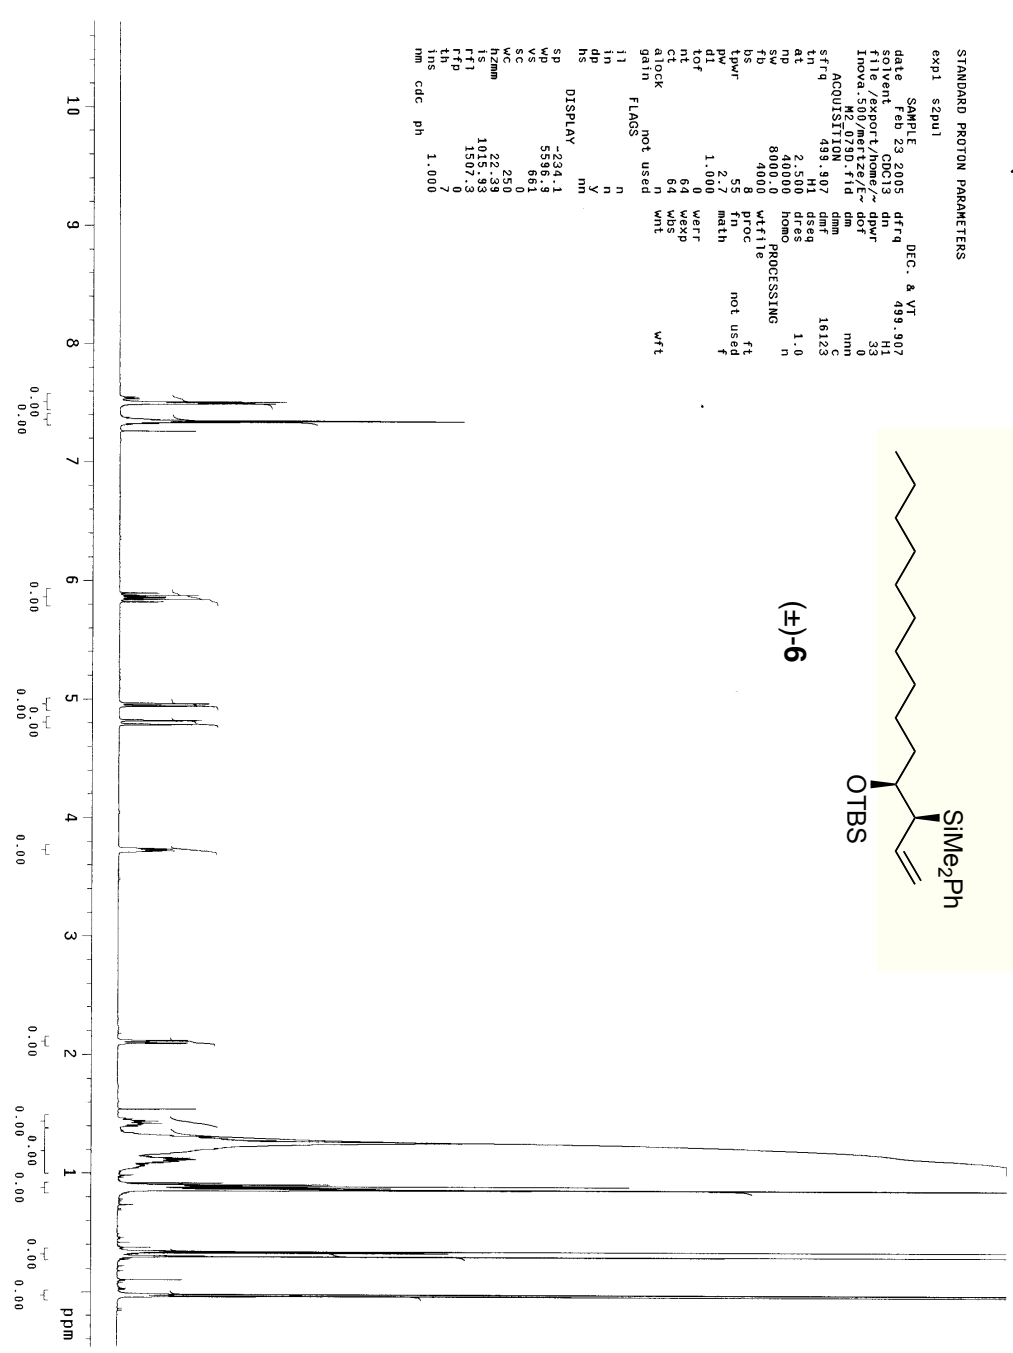

STANDARD PROTON PARAMETERS

```

exp1 s2pu1
SAMPLE      Feb 7 2005   dfrq   DEC. & VT   499.907
solvent     CDCl3       dn      H1
file        /export/home/~dpwr   33
M2.08138a.fid  no      mn
ACQUISITION 499.907   dnm    16123
sfrq       499.907   darf
tn         2.501   dsed
ft         40000   homo
np         8000.0   homo
sw         40000   homo
f2         4000   wif1le
pwr        5.7     math
dovr       1.000   wif1le   not used f
di         2.7     math
tof        1.000   werr
ct         120     usxp
atlock     n      wnt
gain       not used
flags      not used
l1         n
l2         n
l3         n
l4         n
l5         n
l6         n
l7         n
l8         n
l9         n
l10        n
l11        n
l12        n
l13        n
l14        n
l15        n
l16        n
l17        n
l18        n
l19        n
l20        n
l21        n
l22        n
l23        n
l24        n
l25        n
l26        n
l27        n
l28        n
l29        n
l30        n
l31        n
l32        n
l33        n
l34        n
l35        n
l36        n
l37        n
l38        n
l39        n
l40        n
l41        n
l42        n
l43        n
l44        n
l45        n
l46        n
l47        n
l48        n
l49        n
l50        n
l51        n
l52        n
l53        n
l54        n
l55        n
l56        n
l57        n
l58        n
l59        n
l60        n
l61        n
l62        n
l63        n
l64        n
l65        n
l66        n
l67        n
l68        n
l69        n
l70        n
l71        n
l72        n
l73        n
l74        n
l75        n
l76        n
l77        n
l78        n
l79        n
l80        n
l81        n
l82        n
l83        n
l84        n
l85        n
l86        n
l87        n
l88        n
l89        n
l90        n
l91        n
l92        n
l93        n
l94        n
l95        n
l96        n
l97        n
l98        n
l99        n
l100       n
l101       n
l102       n
l103       n
l104       n
l105       n
l106       n
l107       n
l108       n
l109       n
l110       n
l111       n
l112       n
l113       n
l114       n
l115       n
l116       n
l117       n
l118       n
l119       n
l120       n
l121       n
l122       n
l123       n
l124       n
l125       n
l126       n
l127       n
l128       n
l129       n
l130       n
l131       n
l132       n
l133       n
l134       n
l135       n
l136       n
l137       n
l138       n
l139       n
l140       n
l141       n
l142       n
l143       n
l144       n
l145       n
l146       n
l147       n
l148       n
l149       n
l150       n
l151       n
l152       n
l153       n
l154       n
l155       n
l156       n
l157       n
l158       n
l159       n
l160       n
l161       n
l162       n
l163       n
l164       n
l165       n
l166       n
l167       n
l168       n
l169       n
l170       n
l171       n
l172       n
l173       n
l174       n
l175       n
l176       n
l177       n
l178       n
l179       n
l180       n
l181       n
l182       n
l183       n
l184       n
l185       n
l186       n
l187       n
l188       n
l189       n
l190       n
l191       n
l192       n
l193       n
l194       n
l195       n
l196       n
l197       n
l198       n
l199       n
l200       n
l201       n
l202       n
l203       n
l204       n
l205       n
l206       n
l207       n
l208       n
l209       n
l210       n
l211       n
l212       n
l213       n
l214       n
l215       n
l216       n
l217       n
l218       n
l219       n
l220       n
l221       n
l222       n
l223       n
l224       n
l225       n
l226       n
l227       n
l228       n
l229       n
l230       n
l231       n
l232       n
l233       n
l234       n
l235       n
l236       n
l237       n
l238       n
l239       n
l240       n
l241       n
l242       n
l243       n
l244       n
l245       n
l246       n
l247       n
l248       n
l249       n
l250       n
l251       n
l252       n
l253       n
l254       n
l255       n
l256       n
l257       n
l258       n
l259       n
l260       n
l261       n
l262       n
l263       n
l264       n
l265       n
l266       n
l267       n
l268       n
l269       n
l270       n
l271       n
l272       n
l273       n
l274       n
l275       n
l276       n
l277       n
l278       n
l279       n
l280       n
l281       n
l282       n
l283       n
l284       n
l285       n
l286       n
l287       n
l288       n
l289       n
l290       n
l291       n
l292       n
l293       n
l294       n
l295       n
l296       n
l297       n
l298       n
l299       n
l300       n
l301       n
l302       n
l303       n
l304       n
l305       n
l306       n
l307       n
l308       n
l309       n
l310       n
l311       n
l312       n
l313       n
l314       n
l315       n
l316       n
l317       n
l318       n
l319       n
l320       n
l321       n
l322       n
l323       n
l324       n
l325       n
l326       n
l327       n
l328       n
l329       n
l330       n
l331       n
l332       n
l333       n
l334       n
l335       n
l336       n
l337       n
l338       n
l339       n
l340       n
l341       n
l342       n
l343       n
l344       n
l345       n
l346       n
l347       n
l348       n
l349       n
l350       n
l351       n
l352       n
l353       n
l354       n
l355       n
l356       n
l357       n
l358       n
l359       n
l360       n
l361       n
l362       n
l363       n
l364       n
l365       n
l366       n
l367       n
l368       n
l369       n
l370       n
l371       n
l372       n
l373       n
l374       n
l375       n
l376       n
l377       n
l378       n
l379       n
l380       n
l381       n
l382       n
l383       n
l384       n
l385       n
l386       n
l387       n
l388       n
l389       n
l390       n
l391       n
l392       n
l393       n
l394       n
l395       n
l396       n
l397       n
l398       n
l399       n
l400       n
l401       n
l402       n
l403       n
l404       n
l405       n
l406       n
l407       n
l408       n
l409       n
l410       n
l411       n
l412       n
l413       n
l414       n
l415       n
l416       n
l417       n
l418       n
l419       n
l420       n
l421       n
l422       n
l423       n
l424       n
l425       n
l426       n
l427       n
l428       n
l429       n
l430       n
l431       n
l432       n
l433       n
l434       n
l435       n
l436       n
l437       n
l438       n
l439       n
l440       n
l441       n
l442       n
l443       n
l444       n
l445       n
l446       n
l447       n
l448       n
l449       n
l450       n
l451       n
l452       n
l453       n
l454       n
l455       n
l456       n
l457       n
l458       n
l459       n
l460       n
l461       n
l462       n
l463       n
l464       n
l465       n
l466       n
l467       n
l468       n
l469       n
l470       n
l471       n
l472       n
l473       n
l474       n
l475       n
l476       n
l477       n
l478       n
l479       n
l480       n
l481       n
l482       n
l483       n
l484       n
l485       n
l486       n
l487       n
l488       n
l489       n
l490       n
l491       n
l492       n
l493       n
l494       n
l495       n
l496       n
l497       n
l498       n
l499       n
l500       n
l501       n
l502       n
l503       n
l504       n
l505       n
l506       n
l507       n
l508       n
l509       n
l510       n
l511       n
l512       n
l513       n
l514       n
l515       n
l516       n
l517       n
l518       n
l519       n
l520       n
l521       n
l522       n
l523       n
l524       n
l525       n
l526       n
l527       n
l528       n
l529       n
l530       n
l531       n
l532       n
l533       n
l534       n
l535       n
l536       n
l537       n
l538       n
l539       n
l540       n
l541       n
l542       n
l543       n
l544       n
l545       n
l546       n
l547       n
l548       n
l549       n
l550       n
l551       n
l552       n
l553       n
l554       n
l555       n
l556       n
l557       n
l558       n
l559       n
l560       n
l561       n
l562       n
l563       n
l564       n
l565       n
l566       n
l567       n
l568       n
l569       n
l570       n
l571       n
l572       n
l573       n
l574       n
l575       n
l576       n
l577       n
l578       n
l579       n
l580       n
l581       n
l582       n
l583       n
l584       n
l585       n
l586       n
l587       n
l588       n
l589       n
l590       n
l591       n
l592       n
l593       n
l594       n
l595       n
l596       n
l597       n
l598       n
l599       n
l600       n
l601       n
l602       n
l603       n
l604       n
l605       n
l606       n
l607       n
l608       n
l609       n
l610       n
l611       n
l612       n
l613       n
l614       n
l615       n
l616       n
l617       n
l618       n
l619       n
l620       n
l621       n
l622       n
l623       n
l624       n
l625       n
l626       n
l627       n
l628       n
l629       n
l630       n
l631       n
l632       n
l633       n
l634       n
l635       n
l636       n
l637       n
l638       n
l639       n
l640       n
l641       n
l642       n
l643       n
l644       n
l645       n
l646       n
l647       n
l648       n
l649       n
l650       n
l651       n
l652       n
l653       n
l654       n
l655       n
l656       n
l657       n
l658       n
l659       n
l660       n
l661       n
l662       n
l663       n
l664       n
l665       n
l666       n
l667       n
l668       n
l669       n
l670       n
l671       n
l672       n
l673       n
l674       n
l675       n
l676       n
l677       n
l678       n
l679       n
l680       n
l681       n
l682       n
l683       n
l684       n
l685       n
l686       n
l687       n
l688       n
l689       n
l690       n
l691       n
l692       n
l693       n
l694       n
l695       n
l696       n
l697       n
l698       n
l699       n
l700       n
l701       n
l702       n
l703       n
l704       n
l705       n
l706       n
l707       n
l708       n
l709       n
l710       n
l711       n
l712       n
l713       n
l714       n
l715       n
l716       n
l717       n
l718       n
l719       n
l720       n
l721       n
l722       n
l723       n
l724       n
l725       n
l726       n
l727       n
l728       n
l729       n
l730       n
l731       n
l732       n
l733       n
l734       n
l735       n
l736       n
l737       n
l738       n
l739       n
l740       n
l741       n
l742       n
l743       n
l744       n
l745       n
l746       n
l747       n
l748       n
l749       n
l750       n
l751       n
l752       n
l753       n
l754       n
l755       n
l756       n
l757       n
l758       n
l759       n
l760       n
l761       n
l762       n
l763       n
l764       n
l765       n
l766       n
l767       n
l768       n
l769       n
l770       n
l771       n
l772       n
l773       n
l774       n
l775       n
l776       n
l777       n
l778       n
l779       n
l780       n
l781       n
l782       n
l783       n
l784       n
l785       n
l786       n
l787       n
l788       n
l789       n
l790       n
l791       n
l792       n
l793       n
l794       n
l795       n
l796       n
l797       n
l798       n
l799       n
l800       n
l801       n
l802       n
l803       n
l804       n
l805       n
l806       n
l807       n
l808       n
l809       n
l810       n
l811       n
l812       n
l813       n
l814       n
l815       n
l816       n
l817       n
l818       n
l819       n
l820       n
l821       n
l822       n
l823       n
l824       n
l825       n
l826       n
l827       n
l828       n
l829       n
l830       n
l831       n
l832       n
l833       n
l834       n
l835       n
l836       n
l837       n
l838       n
l839       n
l840       n
l841       n
l842       n
l843       n
l844       n
l845       n
l846       n
l847       n
l848       n
l849       n
l850       n
l851       n
l852       n
l853       n
l854       n
l855       n
l856       n
l857       n
l858       n
l859       n
l860       n
l861       n
l862       n
l863       n
l864       n
l865       n
l866       n
l867       n
l868       n
l869       n
l870       n
l871       n
l872       n
l873       n
l874       n
l875       n
l876       n
l877       n
l878       n
l879       n
l880       n
l881       n
l882       n
l883       n
l884       n
l885       n
l886       n
l887       n
l888       n
l889       n
l890       n
l891       n
l892       n
l893       n
l894       n
l895       n
l896       n
l897       n
l898       n
l899       n
l900       n
l901       n
l902       n
l903       n
l904       n
l905       n
l906       n
l907       n
l908       n
l909       n
l910       n
l911       n
l912       n
l913       n
l914       n
l915       n
l916       n
l917       n
l918       n
l919       n
l920       n
l921       n
l922       n
l923       n
l924       n
l925       n
l926       n
l927       n
l928       n
l929       n
l930       n
l931       n
l932       n
l933       n
l934       n
l935       n
l936       n
l937       n
l938       n
l939       n
l940       n
l941       n
l942       n
l943       n
l944       n
l945       n
l946       n
l947       n
l948       n
l949       n
l950       n
l951       n
l952       n
l953       n
l954       n
l955       n
l956       n
l957       n
l958       n
l959       n
l960       n
l961       n
l962       n
l963       n
l964       n
l965       n
l966       n
l967       n
l968       n
l969       n
l970       n
l971       n
l972       n
l973       n
l974       n
l975       n
l976       n
l977       n
l978       n
l979       n
l980       n
l981       n
l982       n
l983       n
l984       n
l985       n
l986       n
l987       n
l988       n
l989       n
l990       n
l991       n
l992       n
l993       n
l994       n
l995       n
l996       n
l997       n
l998       n
l999       n
1000       n

```

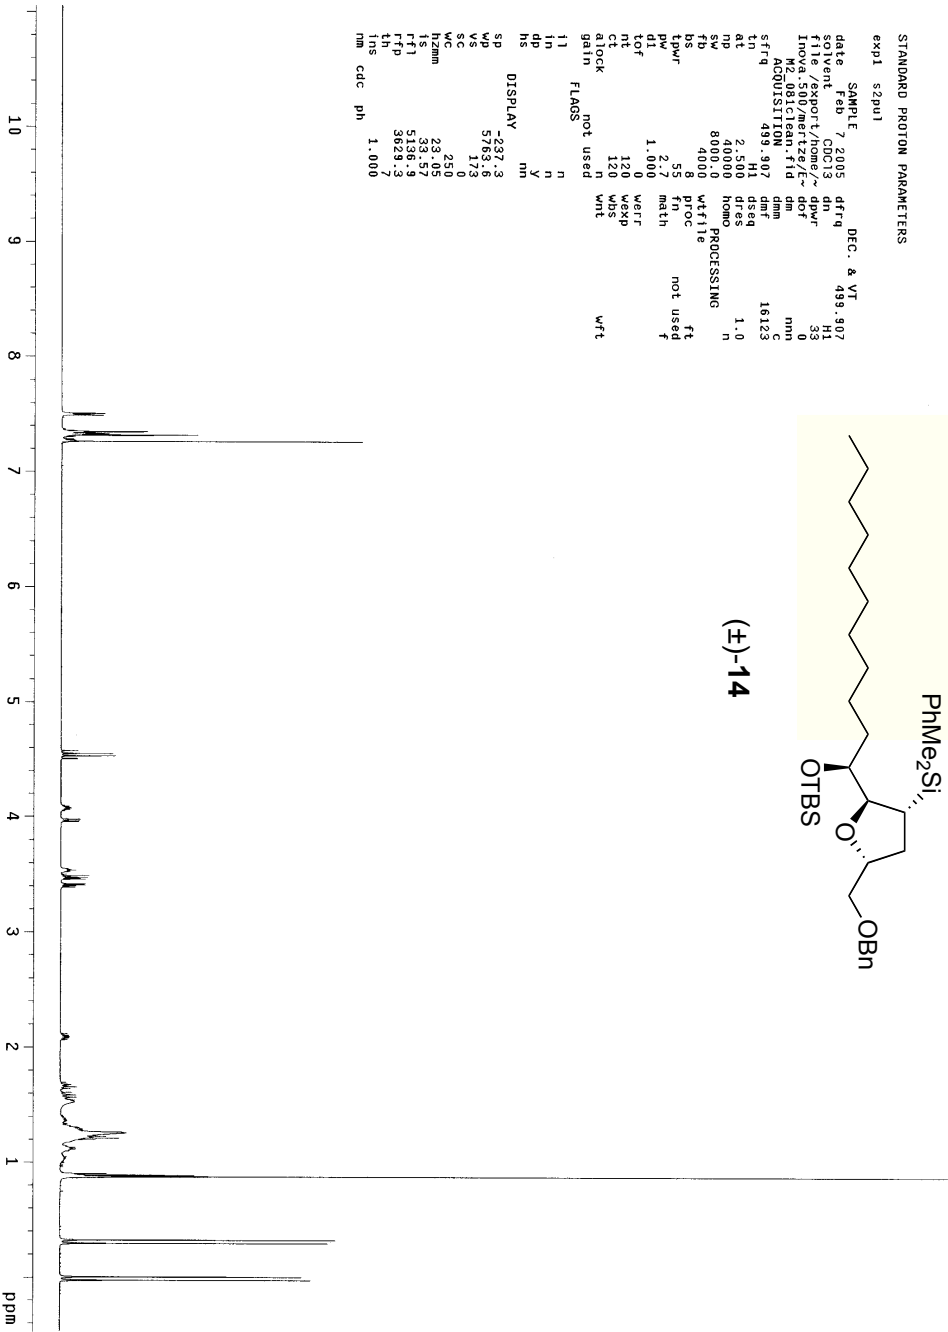

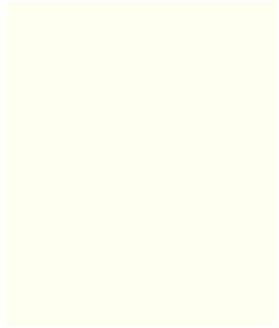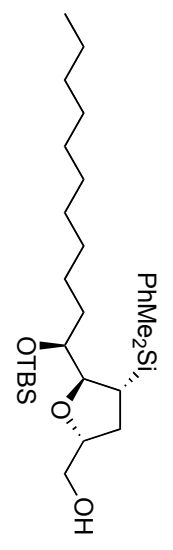

(±)-19

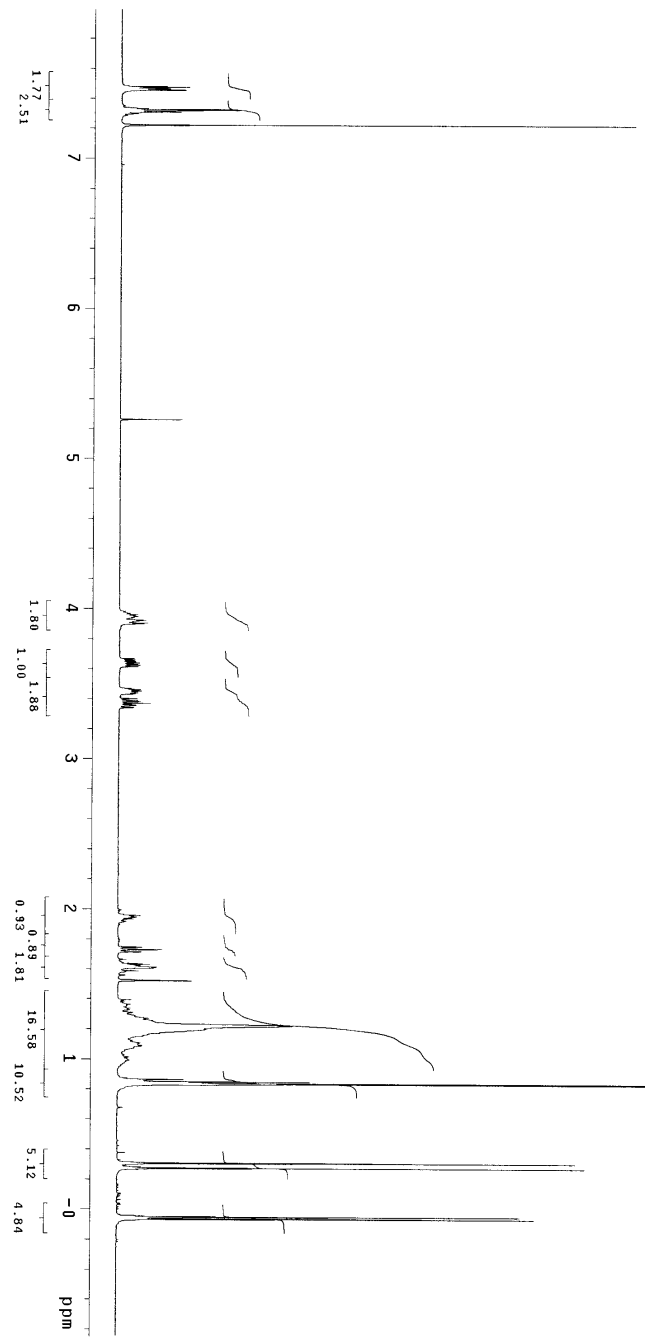

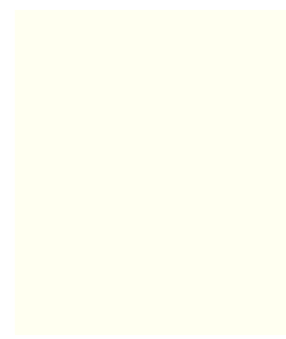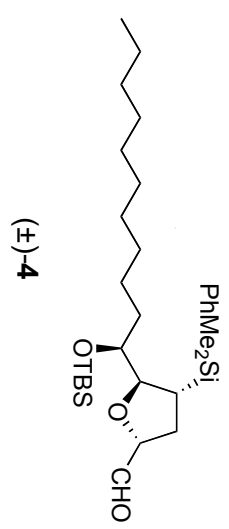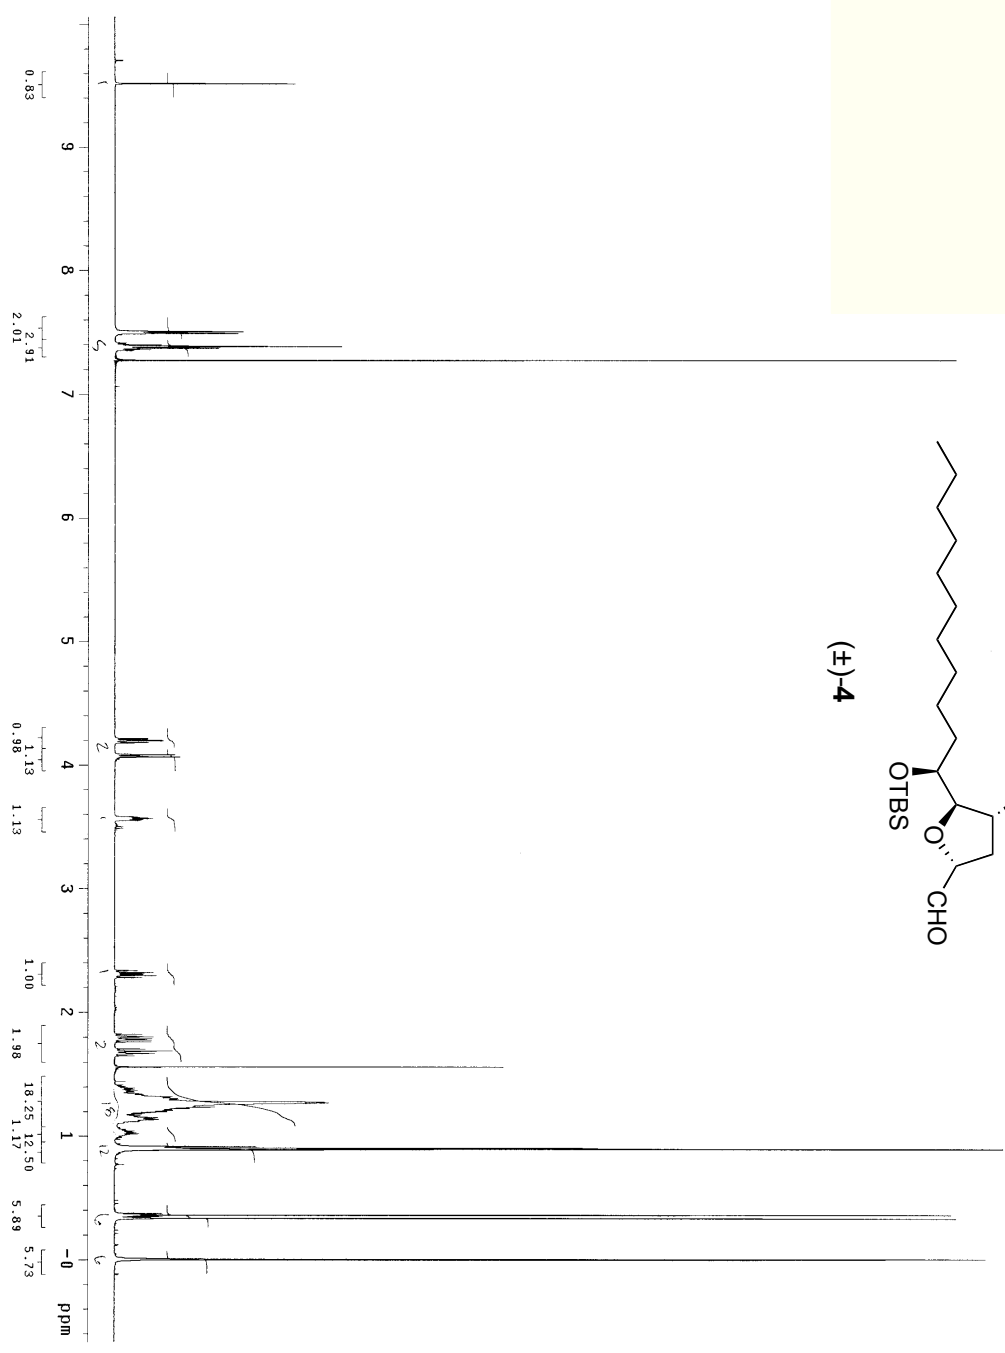

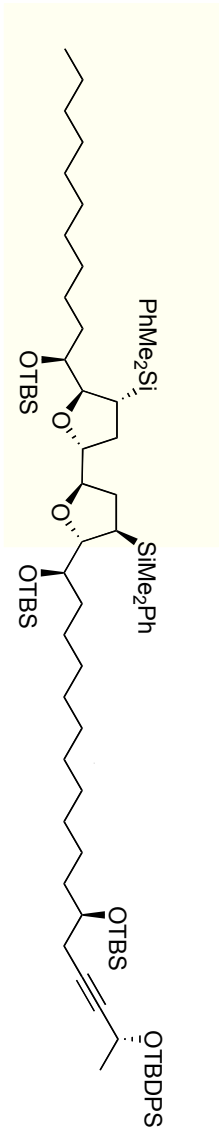

15,  $\geq 20$  : 1 d.s.

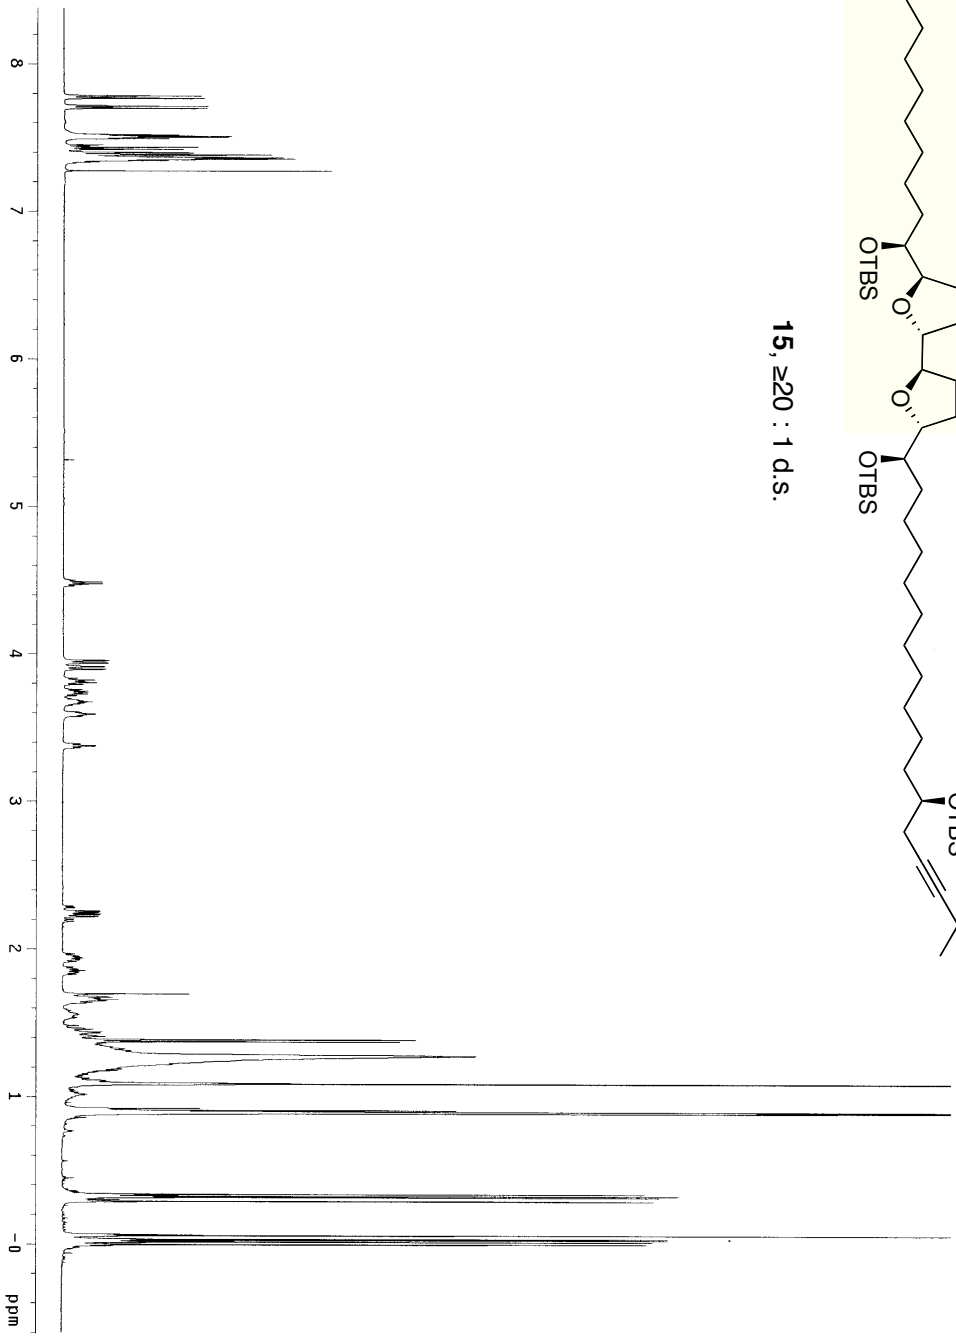



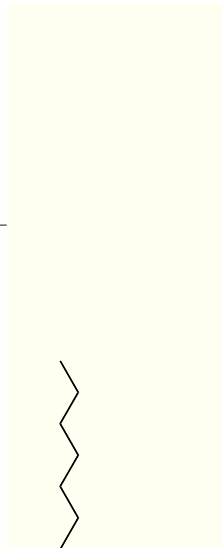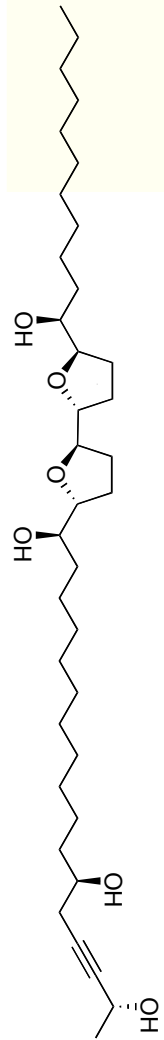

17

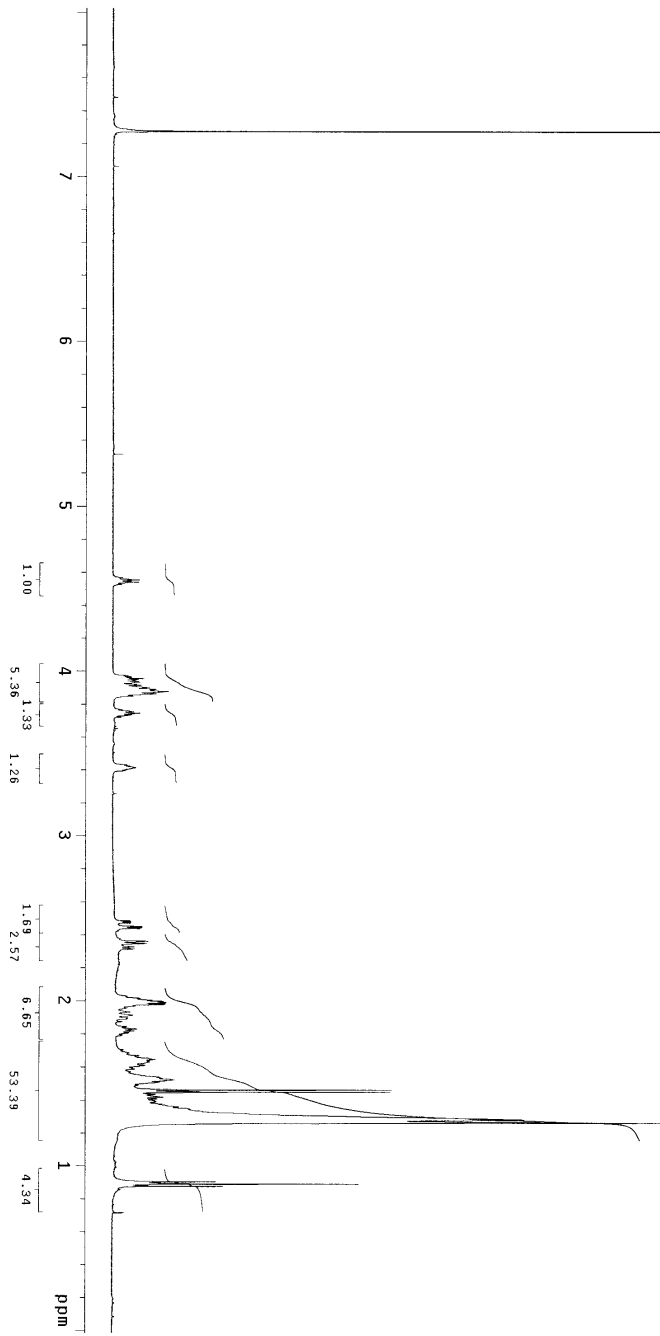

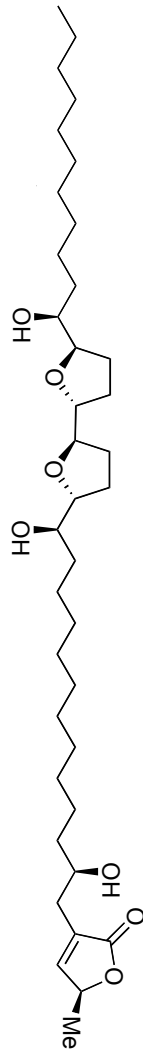

synthetic (+)-bullaticin (**1**)  
<sup>1</sup>H NMR spectrum  
500 MHz, CDCl<sub>3</sub>

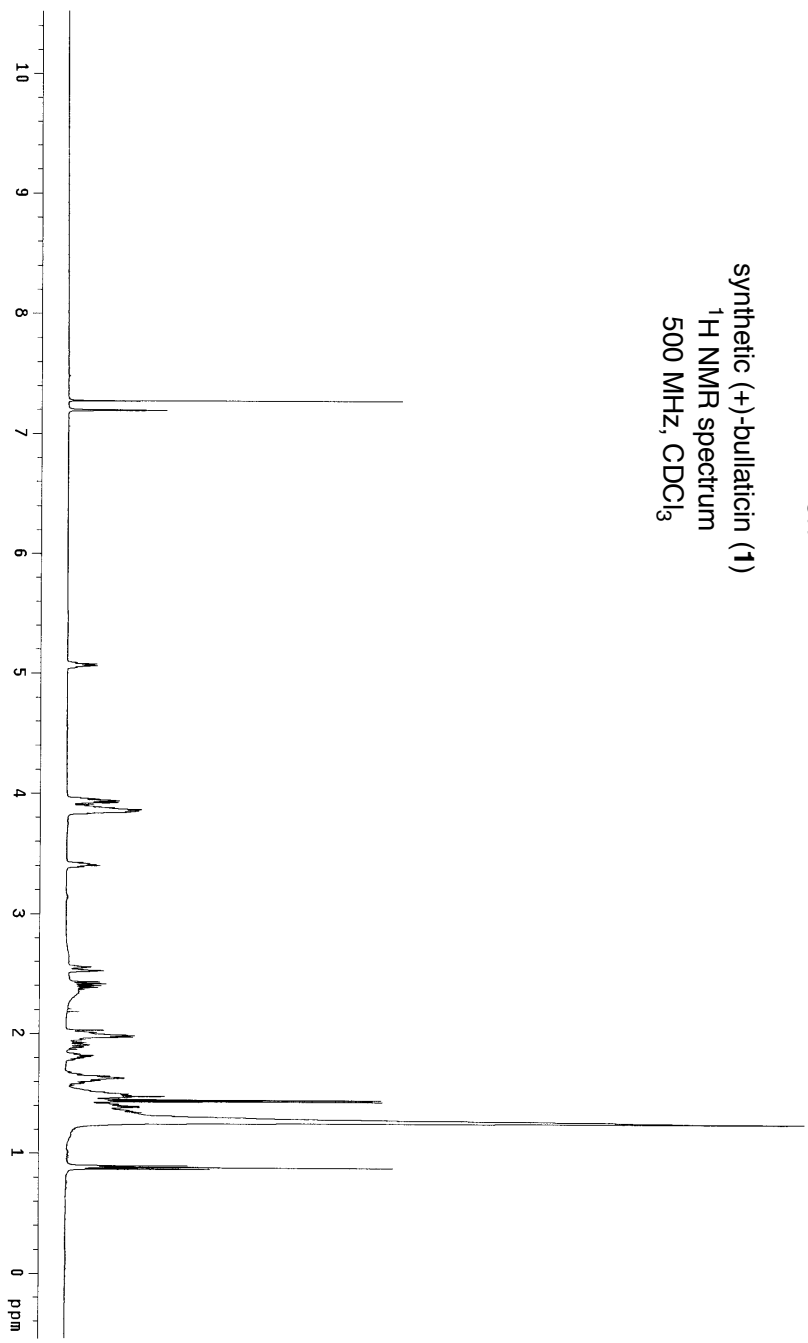

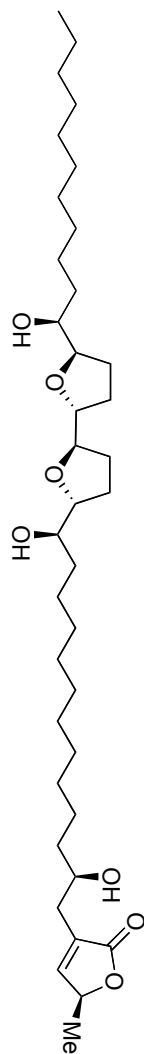

synthetic (+)-bullaticin (**1**)  
<sup>13</sup>C NMR spectrum  
125 MHz, CDCl<sub>3</sub>

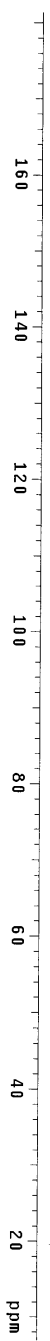

Supplement: NIHMS60233-supplement-SI1.pdf [file NIHMS60233-supplement-SI1.pdf]
